# Supplementary material for: Functional expression of opioid receptors and other human GPCRs in yeast engineered to produce human sterols
Source: PubMed Central journal article supplement (PMC9130329; doi:10.1038/s41467-022-30570-7), 2022-05-24
Supplement: 41467_2022_30570_MOESM10_ESM.pdf [file 41467_2022_30570_MOESM10_ESM.pdf]

**Title:** Supplementary Data 1.

**Description:** A list of the yeast strains used in this study, including their strain IDs and sources.

**Title:** Supplementary Data 2.

**Description:** A list of all plasmids used in this study, including descriptions, IDs , and sources.

**Title:** Supplementary Data 3.

**Description:** The DNA sequences used for CRISPR-Cas9-based genomic edits including protospacer sequences and repair templates.

**Title:** Supplementary Data 4.

**Description:** All gene and tag DNA sequences used in this work.

**Title:** Supplementary Data 5.

**Description:** Summary of sensitivities of tested GPCRs in more native environments previously reported in the literature.

**Title:** Supplementary Data 6.

**Description:** Summary of different metrics of activity, including raw fluorescence values, for all biosensors used in this study.

**Title:** Supplementary Data 7.

**Description:** A list of all GPCR effectors used, their peptide sequences if relevant, and their sources.
